# Supplementary material
Source: PubMed Central journal article supplement (PMC3377319)

## SUPPLEMENTARY DATA:

### Figure S1: Histological properties of tumors developed in *junD*<sup>-/-</sup> mice

(A) HES coloration of sections from *ras* and *ras junD*<sup>-/-</sup> tumours. (B) Histological analysis of sections from *ras* and *ras junD*<sup>-/-</sup> tumours co-stained with specific antibodies against E-cadherin (in green, anti-E-cadherin antibody : 4065, Cell signalling ; 2<sup>nd</sup> antibody : anti-rabbit-Alexa, A-11070 Molecular probes) and Vimentin (in red, anti-Vimentin antibody : RV202, abcam ; 2<sup>nd</sup> antibody : anti-mouse-Cy3, 715-165-151, Jackson ImmunoResearch) or E-cadherin (in green) and SM- $\alpha$ -actin (in red, anti- SM- $\alpha$ -actin antibody : A2547, clone1A4, Sigma; 2<sup>nd</sup> antibody : anti-mouse-Cy3, 715-165-151, Jackson ImmunoResearch), as indicated. (C) Histological analysis of sections from *ras* and *ras junD*<sup>-/-</sup> tumours specifically stained with JunD-specific antibody (sc-74, tebu-bio). Arrows indicate typical nuclear staining in epithelial cells (e) or surrounding fibroblasts (f). As expected, tumors from *junD*<sup>-/-</sup> mice (c-h) did not exhibit any JunD staining. (D) CXCL12-staining detected in *ras junD*<sup>-/-</sup> tumours showing high fibroblastic expression as well as staining at the surface of epithelial cells, most probably reflecting fixation of the CXCL12 ligand on CXCR4-receptor. (E) Typical HES views of grafted tumours after cell injection in *wt* (a,c) and *junD*<sup>-/-</sup> mice (b,d). Scale bars = 40 $\mu$ m in (Aa-d;Ba-d;Da,b), 20 $\mu$ m in (Be-h;Dc,d) and 10 $\mu$ m in (C).

### Table S1: *junD*<sup>-/-</sup> fibroblasts exhibit gene expression profiling similar to CAFs

List of CAF-specific genes up-regulated in *junD*<sup>-/-</sup> fibroblasts compared to *wt* cells. Genes are classified according to their function and/or sub-cellular localization. Fold changes correspond to the differential expression levels in *junD*<sup>-/-</sup> fibroblasts versus *wt* cells. Genes in bold were found in studies of reference (Allinen et al. 2004; Farmer et al. 2009).

### Figure S2: CXCL12-pathway is involved in the myofibroblastic properties of *junD*<sup>-/-</sup> fibroblasts

(A) Phase contrast images showing representative immunofluorescence from *wt* and *junD*<sup>-/-</sup> cells co-stained with fluorescent phalloidin (F-actin, in green) and immunofluorescence using a specific SM- $\alpha$ -actin antibody (in red). Merged images reveal co-localization (in yellow) in *junD*<sup>-/-</sup> but not in *wt* cells. (B) Quantification using ImageJ software of myofibroblast markers in *wt* and *junD*<sup>-/-</sup> fibroblasts. The intensity of SM- $\alpha$ -actin and F-actin stainings, the number of adherens junctions (AJ) or focal adhesions (FA) per cell, and the size of FA ( $\mu$ m) are listed. Values are presented as means  $\pm$  SEM. *p* values by student's test are indicated for each measure. A.U. stems for arbitrary units. (C) Left part: Relative levels of SM- $\alpha$ -actin mRNA in *wt* and *junD*<sup>-/-</sup> fibroblasts.  $\beta$ 2-microglobulin was used as an internal control. Right part: SM- $\alpha$ -actin mRNA levels in *junD*<sup>-/-</sup> fibroblasts following silencing of CXCL12 (siRNA CXCL12) or HIF-1 $\alpha$  (siRNA HIF-1 $\alpha$ ) and compared to untreated cells (-) or to cells transfected with an untargeted siRNA (sicontrol). (D) Upper part: Representative immunofluorescence

of SM- $\alpha$ -actin staining from *junD*<sup>-/-</sup> fibroblasts. Cells were either untreated (-SB431592) or incubated for 12 hours with a specific inhibitor of TGF- $\beta$  pathway (+SB431592). Lower part: Western blot analysis of whole cell extracts from *junD*<sup>-/-</sup> fibroblasts incubated or not with SB431592. Analyses were performed using specific antibodies for SM- $\alpha$ -actin and the phosphorylated form of Smad3, as an internal control for inhibition of the TGF- $\beta$  pathway. Ponceau coloration was used as an internal control for each protein loading; a representative gel is shown. (E) Left part: Relative levels of CXCL12 mRNA in *wt* and *junD*<sup>-/-</sup> fibroblasts.  $\beta$ 2-microglobulin was used as an internal control. Right part: CXCL12 mRNA levels in *junD*<sup>-/-</sup> fibroblasts following silencing of CXCL12 (siRNA CXCL12) or HIF-1 $\alpha$  (siRNA HIF-1 $\alpha$ ) and compared to untreated cells (-) or to cells transfected with an untargeted siRNA (si control). (F) Quantification of myofibroblast markers in *junD*<sup>-/-</sup> fibroblasts after transfection with an untargeted siRNA (+ si control) or with a CXCL12-directed siRNA (+ si CXCL12). (G) Western blot (left) and FACS (right) analysis showing expression of the CXCR4 receptor at the surface of the fibroblasts.

**Figure S3: Variation of HIF-1 $\alpha$  protein levels modulates myofibroblast properties.**

(A) Left part: Relative levels of HIF-1 $\alpha$  mRNA in *wt* and *junD*<sup>-/-</sup> fibroblasts.  $\beta$ 2-microglobulin was used as an internal control. Right part: HIF-1 $\alpha$  mRNA levels in *junD*<sup>-/-</sup> fibroblasts following silencing of CXCL12 (siRNA CXCL12) or HIF-1 $\alpha$  (siRNA HIF-1 $\alpha$ ) and compared to untreated cells (-) or to cells transfected with an untargeted siRNA (si control). (B) Quantification of myofibroblast markers in *junD*<sup>-/-</sup> fibroblasts after transfection with an untargeted siRNA (+ si control) or with a HIF-1 $\alpha$ -directed siRNA (+ si HIF-1 $\alpha$ ). (C) Western blot analysis of cytosolic (C) or nuclear (N) extracts from *wt* fibroblasts incubated or not with DFO. Analysis was performed using a specific HIF-1 $\alpha$  antibody, a kind gift of J. Pouyssegur. Ponceau staining was used as an internal control for protein loading. (D) Quantification of myofibroblast markers in *wt* fibroblasts incubated with (+DFO) or without (-DFO) desferrioxamine (E) Quantification of myofibroblast markers in *junD*<sup>-/-</sup> fibroblasts incubated with (+NAC) or without (-NAC) N-acetyl-cysteine. The intensity of SM- $\alpha$ -actin and F-actin stainings, the number of AJ or FA per cell and the size of FA ( $\mu$ m) are listed. Values are presented as means  $\pm$  SEM. *p* values by student's test are indicated for each measure. A.U. stems for arbitrary units.

**Table S2: Quantitative analysis of HER2, BLC and Lum-A human breast cancers**

Table showing quantitative data of intensity staining, percentage of positive cells and H score (Intensity x % cells) in the epithelium and the stroma of HER2 (n=36), BLC (n=44) or Lum-A (n=23) human breast cancers. Each line represents one tumor. Analyses were performed using CXCR4-, CXCL12-, Ki67- and SM- $\alpha$  actin-specific antibodies. Color code was as the following: maximal intensity value was arbitrarily defined as 4; red represents high signal intensity (Int  $\geq$ 3), orange, intermediate intensity (3 > Int  $\geq$  2); yellow, low intensity (2 > Int  $\geq$  1) and white, faint or no detected



signal ( $Int < 1$ ). Percentage of positive cells was as follow: Yellow :  $0 \leq \% \leq 49$ , orange :  $50 \leq \% \leq 79$ , red :  $\% \geq 80$ . Finally, H score was calculated as follow: Intensity x % cells, and color code was as follow : yellow :  $0 \leq H \leq 159$ , orange :  $160 \leq H \leq 269$ , red :  $\geq 270$ . Both epithelium and stroma have been separately analyzed. Means of each measure are indicated below, as well as p values corresponding to t-test from comparative analysis of HER2 vs BLC, HER2 vs Lum-A and BLC vs Lum-A. p values are represented as highly significant in red ( $p \leq 0.01$ ), significant in orange ( $p \leq 0.05$ ) or non-significant (NS).

**Figure S4: HER2 and BLC tumors are associated with high proliferation rate and pro-inflammatory response when compared to Lum-A**

Sections and histological analysis of HER2 (a-c), BLC (d-f) and Lum-A (g-i) human breast tumors. (A) Representative staining of Ki67 (A) in each tumour type. Below are the tables summarizing the quantitative means of staining intensity (Intensity), percentage of positive cells (% cells) and scoring (Intensity x % cells) in the epithelium and in the stroma, respectively. (B) Representative staining of CD68 in each tumour type. Data are presented below as number of CD68-positive macrophages (mean  $\pm$  SEM). p values by student test are represented as highly significant in red ( $p \leq 0.01$ ), significant in orange ( $p \leq 0.05$ ) or non-significant (NS). Scale bars =  $40\mu\text{m}$ .

**Figure S5: GO term Oxido-reduction (GO:0055114) in HER2, BLC and Lum-A breast cancers**

(A) Pathway analysis plot: each bar of the X-axis represents each gene found in the GO:0055114 pathway. The height of the bar indicates the influence of each gene in the pathway according to the tumor subtype. Horizontal markers in a bar indicate one SD away from the reference point; two or more horizontal markers in a bar indicate a statistically significant association of the corresponding gene with the tumor subtype. (B) Hierarchical clustering of breast tumors based on the GO:0055114 pathway genes. (C / D) Principal component analysis of the GO:0055114 pathway genes. (C) Representation of the tumor using the first two principal components: each dot corresponds to a tumor. The x and y axes represent the coordinates of the tumor on the first and second principal components (respectively). (D) Representation of the genes using the first two principal components: each arrow corresponds to a gene. The x and y coordinates are the correlation of the gene with the first and second principal components (respectively).

**Figure S6: GO term oxido-reductase activity (GO:0016491) in HER2, BLC and Lum-A breast cancers. Same legend as in Figure S5.**

**Table S3: List of genes involved in oxido-reduction that are up-regulated in HER2 vs BLC**

Are indicated in bold the genes that have been cited in the text.

**Figure S7: Specificity of the antibodies used on human samples.**

(A) Western blots showing CXCR4 or JunD protein in extracts from various human breast cancer cell lines. Ponceau coloration was used as an internal control for each protein loading; a representative gel is shown (B) Western blots showing HIF-1 $\alpha$  or CXCL12 protein in extracts from human breast cancer cell lines that have been treated with DFO (for detection of HIF-1 $\alpha$ ) or DFO+Brefeldin (for detection of CXCL12). DFO is an iron chelator, which inhibits PHD and thus increases HIF-1 $\alpha$ ; Brefeldin (100 $\mu$ M) interferes with retrograde transport and avoid secretion of CXCL12 in the medium. (C) Relative levels of CXCR4 (left part) or CXCL12 (right part) mRNA in various breast epithelial cell lines. GAPDH was used as an internal control. (D) The specificity of the human CXCL12-recognizing antibody has been evaluated by performing a competitive assay using 2-fold molecular excess of human CXCL12 ligand. In that aim, since CXCL12 molecular mass is 8kD, we incubated 1300ng of CXCL12 antibody (ab9797 AbCam) with 100ng of human recombinant CXCL12 (350NS R&Dsystem) per reaction. By this method, we depleted the pool of antibody that specifically recognizes CXCL12. We performed IHC on HER2-amplified breast adenocarcinomas following this treatment. The same areas of 3 different tumors are shown with or without human recombinant CXCL12, as indicated. This competitive depletion severely decreased the staining in both fibroblasts and epithelial cells (arrows), further arguing that the antibody we used is specific and the detected staining did not result from unspecific background.



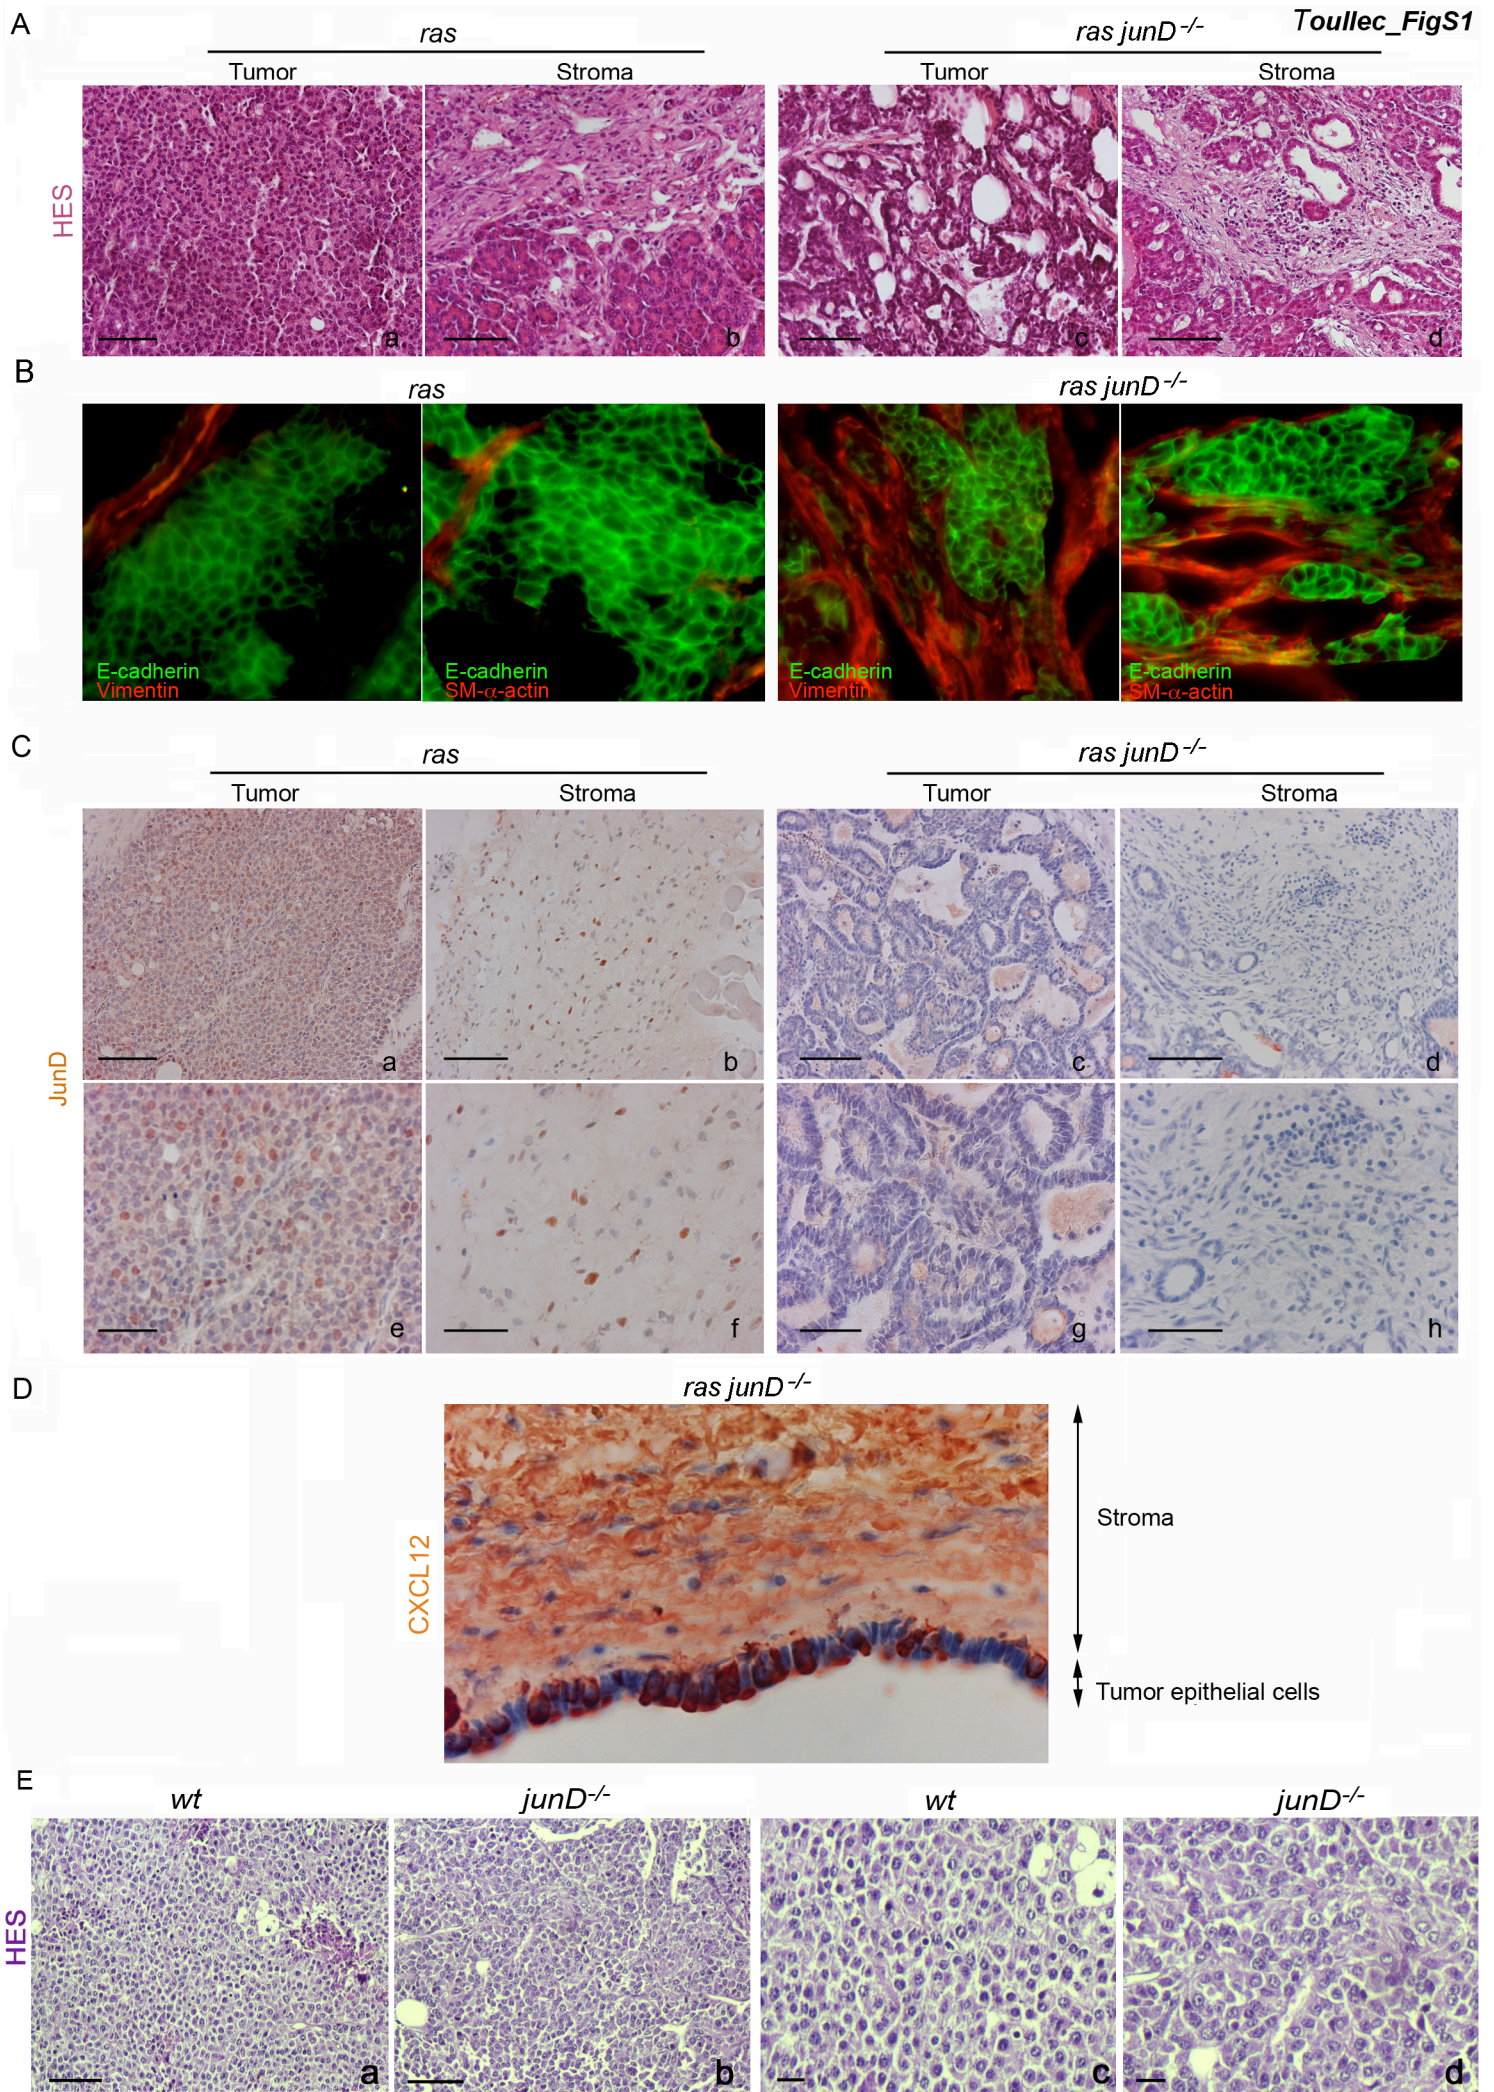



| GeneID                               | Name                 | Gene description                                                                   | Fold         |
|--------------------------------------|----------------------|------------------------------------------------------------------------------------|--------------|
| <b>Extracellular matrix proteins</b> |                      |                                                                                    |              |
| 23794                                | <b>Adams5</b>        | <b>A disintegrin-like and metallopeptidase with thrombospondin type 1 motif, 1</b> | <b>3.18</b>  |
| 12842                                | <b>Col1a1</b>        | <b>Collagen, type I, alpha 1</b>                                                   | <b>1.48</b>  |
| 12843                                | <b>Col1a2</b>        | <b>Collagen, type I, alpha 2</b>                                                   | <b>36.45</b> |
| 12825                                | <b>Col3a1</b>        | <b>Collagen, type III, alpha 1</b>                                                 | <b>17.75</b> |
| 12826                                | Col4a1               | Collagen, type IV, alpha 1                                                         | 1.92         |
| 12835                                | <b>Col6a3</b>        | <b>Collagen, type VI, alpha 3</b>                                                  | <b>5.92</b>  |
| 12837                                | Col8a1               | Collagen, type VIII, alpha 1                                                       | 1.87         |
| 68588                                | <b>Cthrc1</b>        | <b>Collagen triple helix repeat containing 1</b>                                   | <b>5.63</b>  |
| 14268                                | <b b="" fn1<=""></b> | <b>Fibronectin 1</b>                                                               | <b>1.46</b>  |
| 16948                                | Lox                  | Lysyl oxidase                                                                      | 1.94         |
| 268977                               | Ltpb1                | Latent transforming growth factor beta binding protein 1                           | 1.64         |
| 17181                                | <b>Matn2</b>         | <b>Matrilin 2</b>                                                                  | <b>1.44</b>  |
| 50530                                | Mfap5                | Microfibrillar associated protein 5                                                | 1.83         |
| 17390                                | <b>Mmp2</b>          | <b>Matrix metalloproteinase 2</b>                                                  | <b>1.66</b>  |
| 17387                                | <b>Mmp14</b>         | <b>Matrix metalloproteinase 14 (membrane-inserted)</b>                             | <b>1.51</b>  |
| 17389                                | Mmp16                | Matrix metalloproteinase 16                                                        | 3.25         |
| 18073                                | <b>Nid1</b>          | <b>Nidogen 1</b>                                                                   | <b>4.42</b>  |
| 19242                                | <b>Ptn</b>           | <b>Plectrophenin</b>                                                               | <b>3.82</b>  |
| 116847                               | Prelp                | Proline arginine-rich end leucine-rich repeat                                      | 2.18         |
| 13602                                | <b>Sparcl1</b>       | <b>SPARC-like 1 (mast9, hev1n)</b>                                                 | <b>1.30</b>  |
| <b>Cytoskeleton</b>                  |                      |                                                                                    |              |
| 11461                                | Actb                 | Actin, beta, cytoplasmic                                                           | 7.25         |
| 11468                                | <b>Actg2</b>         | <b>Actin, gamma 2, smooth muscle, enteric</b>                                      | <b>3.90</b>  |
| 56456                                | Actl6A               | Actin-like 6A                                                                      | 1.25         |
| 60595                                | Actn4                | Actinin alpha 4                                                                    | 1.47         |
| 109676                               | Ank2                 | Ankyrin 2, neuronal                                                                | 3.38         |
| 12798                                | Cnn2                 | Calponin 2                                                                         | 1.75         |
| 18163                                | Ctnd2                | Catenin delta 2                                                                    | 2.87         |
| 13043                                | Cttn                 | Cortactin                                                                          | 1.71         |
| 208846                               | Daam1                | Dishevelled associated activator of morphogenesis 1                                | 2.02         |
| 109619                               | Dctn2                | Dynactin 2                                                                         | 1.26         |
| 140579                               | Elmo2                | Engulfment and cell motility 2                                                     | 1.39         |
| 223254                               | Farp1                | FERM, RhoGEF (Arhgef) and pleckstrin domain protein 1 (chondrocyte-derived)        | 1.46         |
| 14609                                | <b>Gja1</b>          | <b>Gap junction protein, alpha 1, 43kDa (Connexin 43)</b>                          | <b>1.25</b>  |
| 17886                                | Myh9                 | Myosin, heavy polypeptide 9, non-muscle                                            | 1.55         |
| 98932                                | <b>My19</b>          | <b>Myosin, light polypeptide 9, regulatory</b>                                     | <b>1.63</b>  |
| 213019                               | Pdlim2               | PDZ and LIM domain 2                                                               | 2.32         |
| 227937                               | Pkp4                 | Plakophilin 4                                                                      | 1.39         |
| 27205                                | Podxl                | Podocalyxin-like                                                                   | 1.85         |
| 19684                                | Rdx                  | Radixin                                                                            | 2.66         |
| 20259                                | Scn                  | Scinderin                                                                          | 1.30         |
| 21345                                | <b>Tagln</b>         | <b>Transgelin</b>                                                                  | <b>1.74</b>  |
| 21894                                | Tin1                 | Talin 1                                                                            | 1.38         |
| 22004                                | <b>Tpm2</b>          | <b>Tropomyosin 2, beta</b>                                                         | <b>1.36</b>  |
| 74237                                | Tubgcp2              | Tubulin, gamma complex associated protein 2                                        | 1.80         |
| <b>Cell adhesion</b>                 |                      |                                                                                    |              |
| 76709                                | Arpc2                | Actin related protein 2/3 complex, subunit 2                                       | 1.42         |
| 14618                                | Gjb1                 | Gap junction membrane channel protein beta 1                                       | 1.37         |
| 84004                                | Mcam                 | Melanoma cell adhesion molecule                                                    | 2.61         |
| 17967                                | Ncam1                | Neural cell adhesion molecule 1                                                    | 1.89         |
| 75599                                | Podh1                | Protocadherin 1                                                                    | 2.52         |
| 93701                                | Podhgb4              | Protocadherin gamma subfamily B, 4                                                 | 1.92         |
| 20692                                | <b>Sparc</b>         | <b>Secreted protein, acidic, cysteine-rich</b>                                     | <b>9.98</b>  |
| 21826                                | <b>Thbs2</b>         | <b>Thrombospondin 2</b>                                                            | <b>2.24</b>  |
| 81877                                | <b>Tnxb</b>          | <b>Tenascin XB</b>                                                                 | <b>1.30</b>  |
| <b>Chemokines</b>                    |                      |                                                                                    |              |
| 12769                                | Ccr9                 | Chemokine (C-C motif) receptor 9                                                   | 1.44         |
| 20315                                | <b>Cxcl12</b>        | <b>Chemokine (C-X-C motif) ligand 12</b>                                           | <b>1.99</b>  |
| 57266                                | <b>Cxcl14</b>        | <b>Chemokine (C-X-C motif) ligand 14</b>                                           | <b>1.89</b>  |
| <b>Ribosomal proteins</b>            |                      |                                                                                    |              |
| 110954                               | <b>Rpl10</b>         | <b>Ribosomal protein L10</b>                                                       | <b>1.14</b>  |
| 58988                                | <b>Rps6kb2</b>       | <b>Ribosomal protein S6 kinase, 70kDa, polypeptide 2</b>                           | <b>2.07</b>  |
| 20116                                | <b>Rps8</b>          | <b>Ribosomal protein S8</b>                                                        | <b>1.22</b>  |
| <b>Growth factor / Receptor</b>      |                      |                                                                                    |              |
| 69538                                | <b>Antxr1</b>        | <b>Anthrax toxin receptor 1</b>                                                    | <b>2.28</b>  |
| 12033                                | Bcap29               | B-cell receptor-associated protein 29                                              | 1.42         |
| 235505                               | Cd109                | CD109 antigen                                                                      | 2.15         |
| 54219                                | Cd320                | CD320 antigen                                                                      | 1.36         |
| 12520                                | <b>Cd81</b>          | <b>CD 81 antigen</b>                                                               | <b>1.82</b>  |
| 26364                                | Cd97                 | CD97 antigen                                                                       | 1.28         |
| 12801                                | Cnr1                 | Cannabinoid receptor 1 (brain)                                                     | 2.00         |
| 12982                                | Csf2ra               | Colony stimulating factor 2 receptor, alpha, low-affinity (granulocyte-macrophage) | 2.18         |
| 14219                                | <b>Ctgf</b>          | <b>Connective tissue growth factor</b>                                             | <b>2.06</b>  |
| 12305                                | Ddr1                 | Discoidin domain receptor family, member 1                                         | 1.43         |
| 14062                                | <b>F2r</b>           | <b>coagulation factor II (thrombin) receptor</b>                                   | <b>1.21</b>  |
| 14167                                | Fgf12                | Fibroblast growth factor 12                                                        | 1.44         |
| 14184                                | Fgfr3                | Fibroblast growth factor receptor 3                                                | 1.43         |
| 233575                               | Frag1                | FGF receptor activating protein 1                                                  | 1.40         |
| 14600                                | Ghr                  | Growth hormone receptor                                                            | 1.37         |
| 14694                                | <b>Gnb2l1</b>        | <b>Guanine nucleotide binding protein (G protein), beta polypeptide 2 like 1</b>   | <b>1.36</b>  |
| 93695                                | <b>GpnmB</b>         | <b>Glycoprotein (transmembrane) nmB</b>                                            | <b>4.15</b>  |
| 14783                                | Grb10                | Growth factor receptor bound protein 10                                            | 2.00         |
| 15200                                | Hbegf                | heparin-binding EGF-like growth factor                                             | 1.57         |
| 16004                                | Igf2r                | Insulin-like growth factor 2 receptor                                              | 1.68         |
| 16008                                | Igfbp2               | Insulin-like growth factor binding protein 2                                       | 2.15         |
| 16411                                | Itgax                | Integrin alpha X                                                                   | 2.10         |
| 16635                                | Kir4                 | Killer cell lectin-like receptor, subfamily A, member 4                            | 4.00         |
| 56873                                | Lmbr1                | Limb region 1                                                                      | 1.37         |
| 16971                                | <b>Lrp1</b>          | <b>Low density lipoprotein-related protein 1</b>                                   | <b>1.60</b>  |
| 17000                                | Ltr                  | Lymphotoxin B receptor                                                             | 2.22         |
| 80509                                | Med8                 | Mediator of RNA polymerase II transcription, subunit 8                             | 1.70         |
| 18049                                | Ngf                  | Nerve growth factor                                                                | 1.63         |
| 18442                                | P2ry2                | Purinergic receptor P2Y, G-protein coupled 2                                       | 1.60         |
| 12034                                | Phb2                 | Prohibitin 2                                                                       | 1.42         |
| 19263                                | Ptprb                | Protein tyrosine phosphatase, receptor type, B                                     | 10.00        |
| 387341                               | Tas2r106             | Taste receptor, type 2, member 106                                                 | 5.00         |
| 22403                                | Wisp2                | WNT1 inducible signaling pathway protein 2                                         | 1.50         |
| 22415                                | Wnt3                 | Wingless-related MMTV integration site 3                                           | 1.60         |
| 22420                                | Wnt6                 | wingless-related MMTV integration site 6                                           | 1.20         |
| <b>Rho GTP-ases</b>                  |                      |                                                                                    |              |
| 260409                               | Cdc42ep3             | CDC42 effector protein (Rho GTPase binding) 3                                      | 1.58         |
| 303634                               | <b>Gna13</b>         | <b>Guanine nucleotide binding protein, alpha 13</b>                                | <b>2.17</b>  |
| 19353                                | Rac1                 | RAS-related C3 botulinum substrate 1                                               | 1.48         |
| 56044                                | Rala                 | v-ral simian leukemia viral oncogene homolog A                                     | 2.24         |
| 11852                                | Rhob                 | ras homolog gene family, member B                                                  | 2.05         |
| 19877                                | <b>Rock1</b>         | <b>Rho-associated, coiled-coil containing protein kinase 1</b>                     | <b>1.43</b>  |

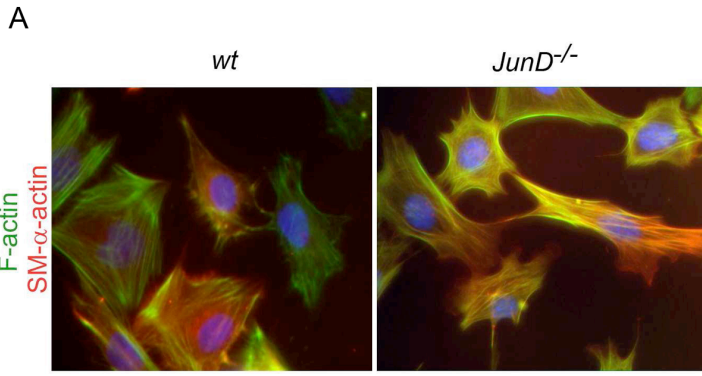

**B**

| Staining   | Quantified Parameter          | Genotype    |                     | p value  |
|------------|-------------------------------|-------------|---------------------|----------|
|            |                               | wt          | JunD <sup>-/-</sup> |          |
| SM-α actin | Fluorescence intensity (A.U.) | 3.6 ± 1.77  | 40.8 ± 9.28         | 4.E-11   |
| F-actin    | Fluorescence intensity (A.U.) | 6.8 ± 3.34  | 37.5 ± 7.43         | 3.E-12   |
| N-cadherin | Number of AJ / Cell           | 17.7 ± 1.96 | 42.1 ± 10.96        | 0.0014   |
| Vinculin   | Number of FA / Cell           | 24.2 ± 5.04 | 98.4 ± 17.92        | 0.00095  |
|            | Size of FA (μm)               | 4.1 ± 1.82  | 7.3 ± 1.87          | 2.64E-10 |

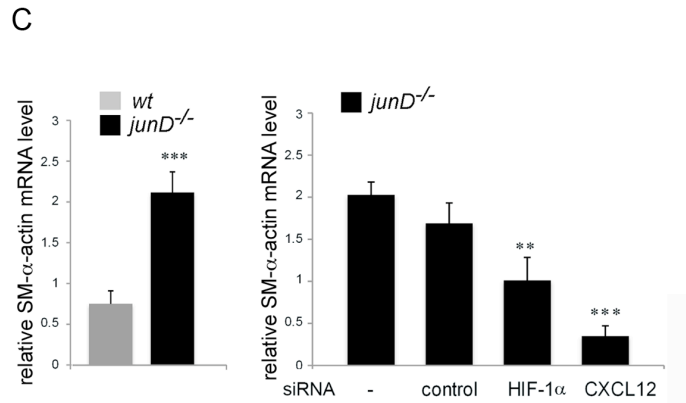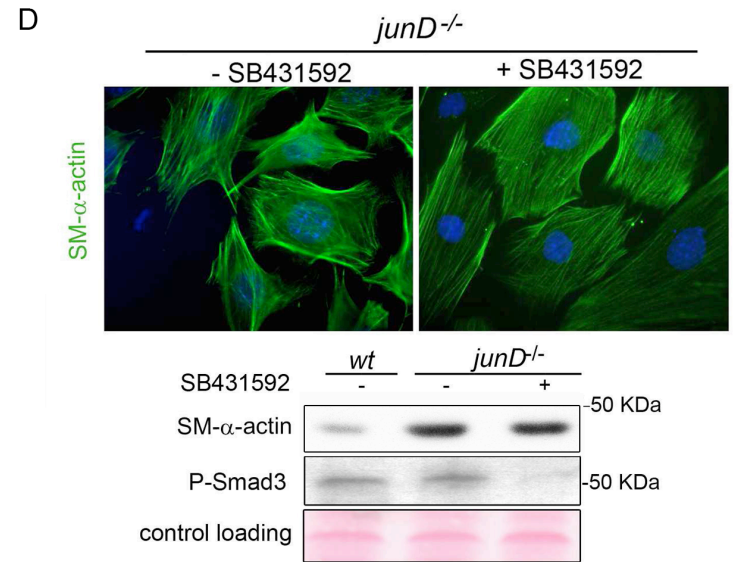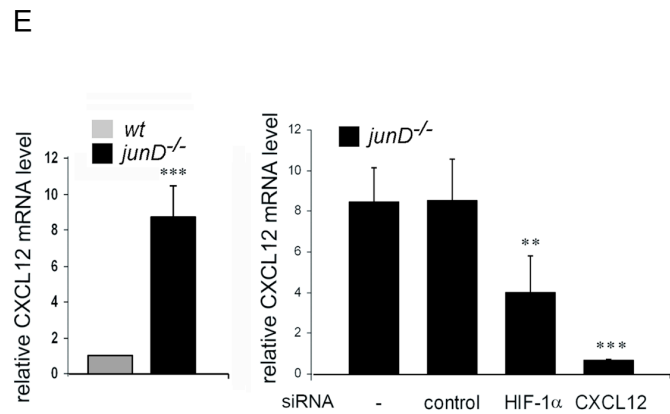

**F**

| Staining   | Quantified Parameter          | JunD <sup>-/-</sup> |             | p value  |
|------------|-------------------------------|---------------------|-------------|----------|
|            |                               | + si control        | + si CXCL12 |          |
| SM-α actin | Fluorescence intensity (A.U.) | 49.3 ± 7.88         | 15.3 ± 3.68 | 1.E-12   |
| F-actin    | Fluorescence intensity (A.U.) | 55.4 ± 13.79        | 16.8 ± 4.54 | 6.E-10   |
| N-cadherin | Number of AJ / Cell           | 50.7 ± 12.10        | 17.6 ± 3.88 | 0.00003  |
| Vinculin   | Number of FA / Cell           | 92.5 ± 33.60        | 33.7 ± 9.90 | 0.001    |
|            | Size of FA (μm)               | 6.57 ± 2.55         | 3.17 ± 1.9  | 4.50E-15 |

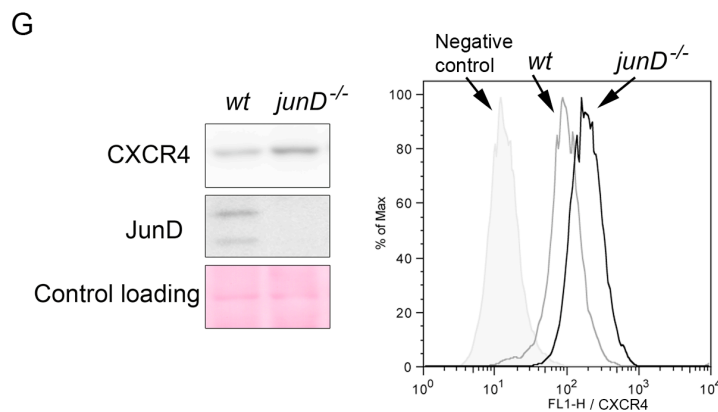

A

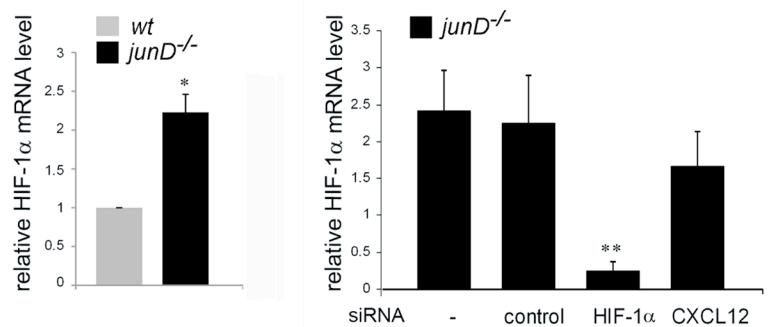

B

| Staining            | Quantified Parameter          | <i>JunD</i> <sup>-/-</sup> |                 | p value  |
|---------------------|-------------------------------|----------------------------|-----------------|----------|
|                     |                               | + si control               | + si HIF        |          |
| SM- $\alpha$ -actin | Fluorescence intensity (A.U.) | 45.6 $\pm$ 14.32           | 12.4 $\pm$ 4.40 | 2.E-08   |
| F-actin             | Fluorescence intensity (A.U.) | 48.3 $\pm$ 10.40           | 16.6 $\pm$ 5.44 | 1.E-10   |
| N-cadherin          | Number of AJ / Cell           | 41.5 $\pm$ 8.80            | 21.5 $\pm$ 5.50 | 0.00025  |
| Vinculin            | Number of FA / Cell           | 91.7 $\pm$ 23.60           | 33.2 $\pm$ 9.40 | 0.000178 |
|                     | Size of FA ( $\mu$ m)         | 7.7 $\pm$ 0.38             | 3.4 $\pm$ 0.16  | 5.17E-31 |

C

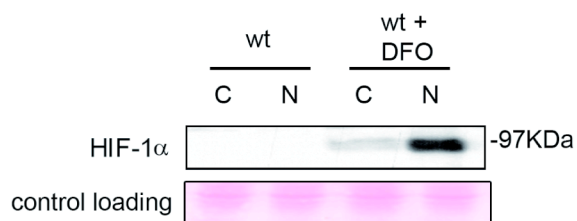

D

| Staining            | Quantified Parameter          | wt               |                  | p value  |
|---------------------|-------------------------------|------------------|------------------|----------|
|                     |                               | - DFO            | + DFO            |          |
| SM- $\alpha$ -actin | Fluorescence intensity (A.U.) | 5 $\pm$ 2.10     | 25.6 $\pm$ 6     | 2E-10    |
| F-actin             | Fluorescence intensity (A.U.) | 9.80 $\pm$ 2.90  | 21.9 $\pm$ 6.8   | 0.00004  |
| N-cadherin          | Number of AJ / Cell           | 41.5 $\pm$ 8.80  | 51.2 $\pm$ 10.3  | 0.00025  |
| Vinculin            | Number of FA / Cell           | 30.14 $\pm$ 8.60 | 65.03 $\pm$ 5.75 | 0.00068  |
|                     | Size of FA ( $\mu$ m)         | 3.88 $\pm$ 1.9   | 6.68 $\pm$ 3.44  | 3.20E-09 |

E

| Staining            | Quantified Parameter          | <i>junD</i> <sup>-/-</sup> |                 | p value  |
|---------------------|-------------------------------|----------------------------|-----------------|----------|
|                     |                               | - NAC                      | + NAC           |          |
| SM- $\alpha$ -actin | Fluorescence intensity (A.U.) | 27 $\pm$ 4.20              | 3.8 $\pm$ 1.5   | 9.90E-07 |
| F-actin             | Fluorescence intensity (A.U.) | 31.8 $\pm$ 11              | 17.9 $\pm$ 5.8  | 0.01333  |
| N-cadherin          | Number of AJ / Cell           | 75.5 $\pm$ 30.9            | 25.9 $\pm$ 7.3  | 0.00227  |
| Vinculin            | Number of FA / Cell           | 159.3 $\pm$ 65.5           | 57.5 $\pm$ 15.2 | 0.00188  |
|                     | Size of FA ( $\mu$ m)         | 6.3 $\pm$ 4.44             | 2.7 $\pm$ 1.73  | 2.70E-07 |





A

Ki67

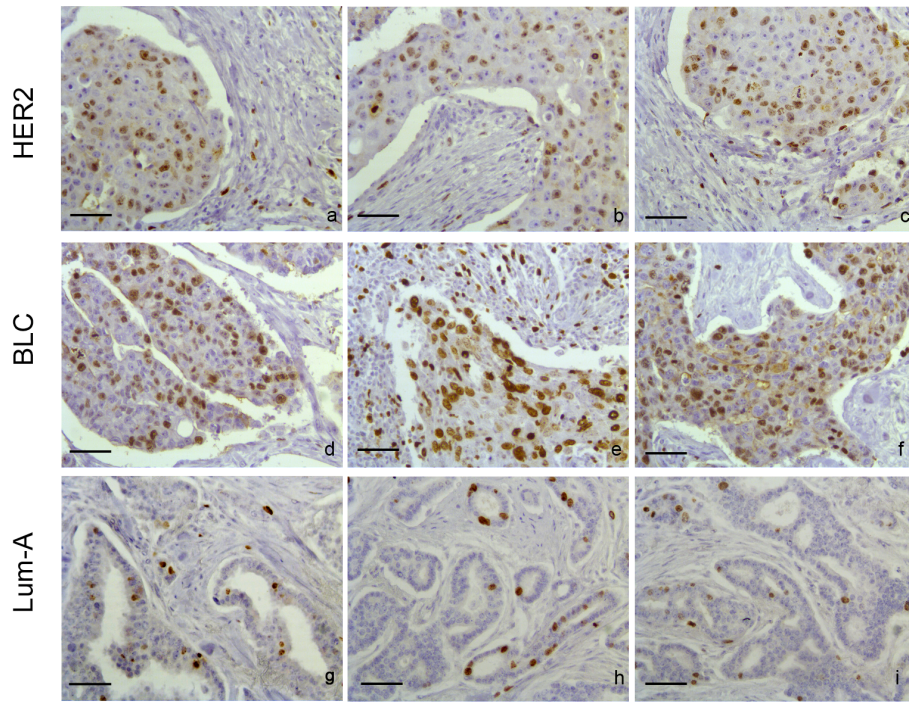

| Ki67    |             | Epithelium |          |         | Stroma    |         |         |
|---------|-------------|------------|----------|---------|-----------|---------|---------|
|         |             | Intensity  | % cells  | H score | Intensity | % cells | H score |
| Mean    | HER2        | 1,4        | 28       | 47      | 0,70      | 3,5     | 8,6     |
|         | BLC         | 2,29       | 53       | 136     | 1,55      | 7,0     | 19,9    |
|         | Lum-A       | 0,7        | 10       | 18      | 0,08      | 0,04    | 0,1     |
| p value | HER2 vs BLC | 2,9E-05    | 8,5E-07  | 2E-07   | 0,003     | 0,050   | 0,040   |
|         | HER2 vs LUM | 0,003      | 0,003    | 0,012   | 0,002     | 0,008   | 0,016   |
|         | BLC vs LUM  | 1,49E-08   | 1,28E-09 | 2E-10   | 1,06E-08  | 3E-06   | 2E-05   |

B

CD68

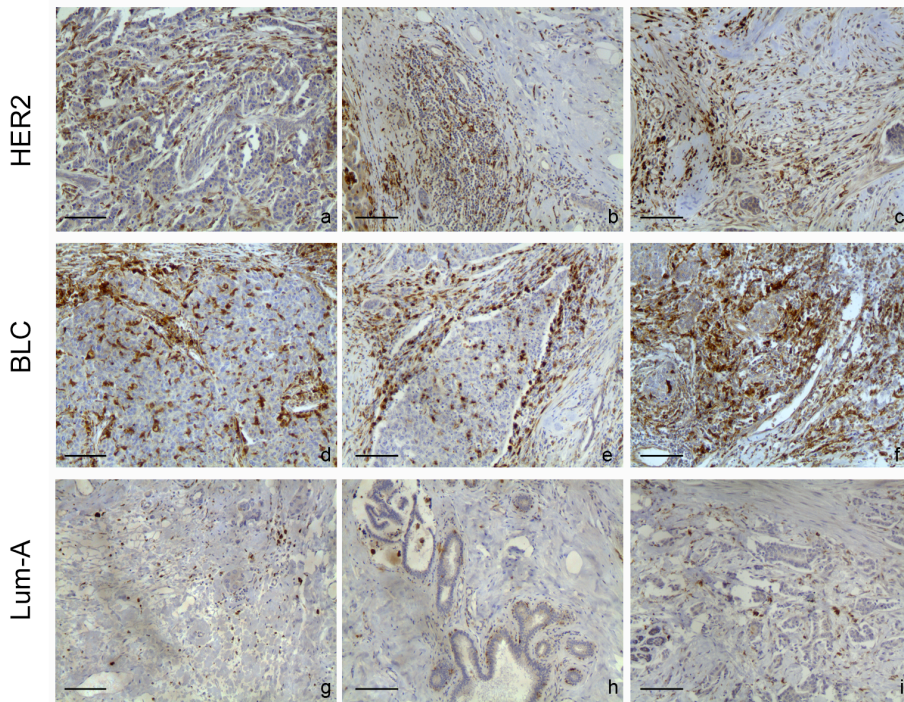

| CD68-positive cells |             | Nb / $\mu\text{m}^2$ |
|---------------------|-------------|----------------------|
| Mean                | HER2        | 0,0544 $\pm$ 8,6E-3  |
|                     | BLC         | 0,0435 $\pm$ 9,6E-3  |
|                     | Lum-A       | 0,0188 $\pm$ 4,1E-3  |
| p value             | HER2 vs BLC | NS                   |
|                     | HER2 vs LUM | 0,002                |
|                     | BLC vs LUM  | 0,03                 |



A

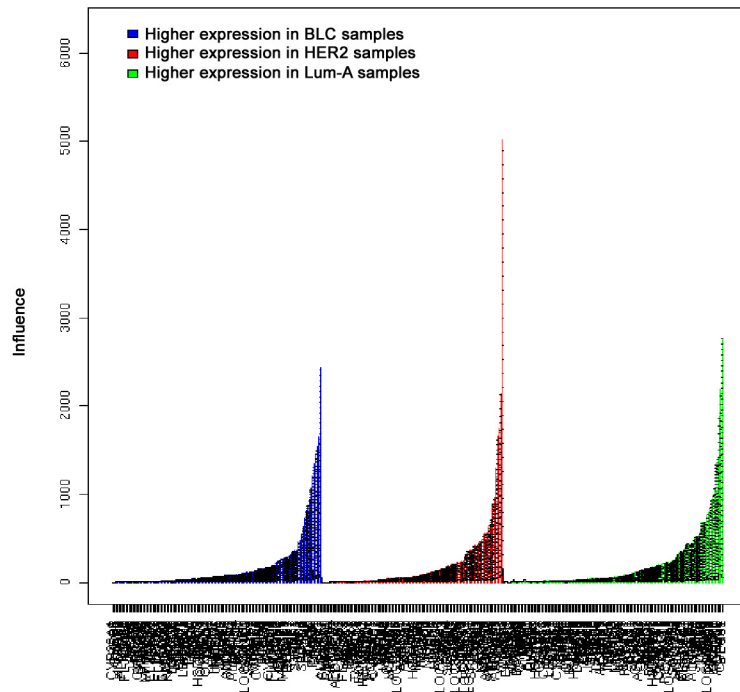

B

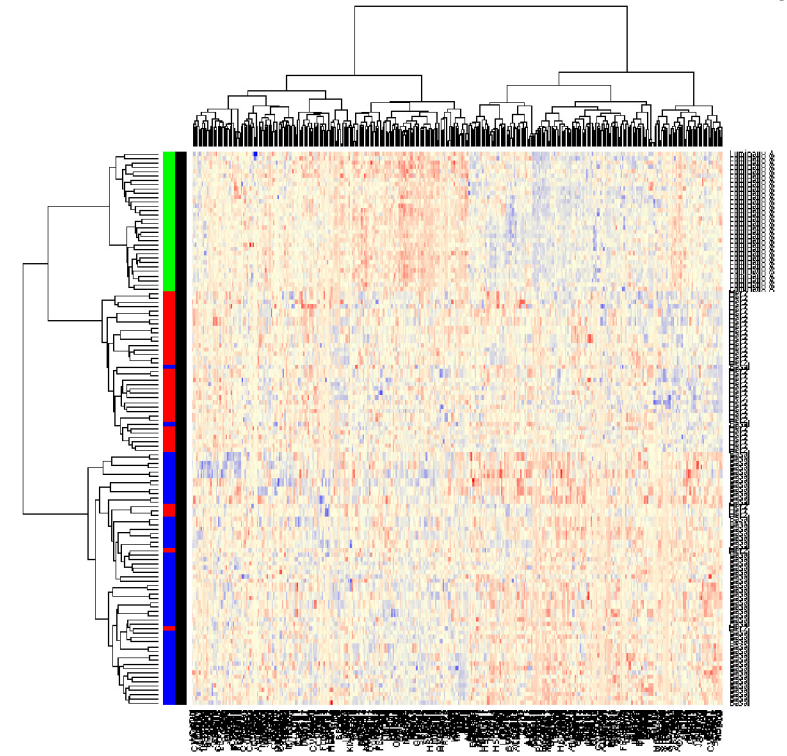

C

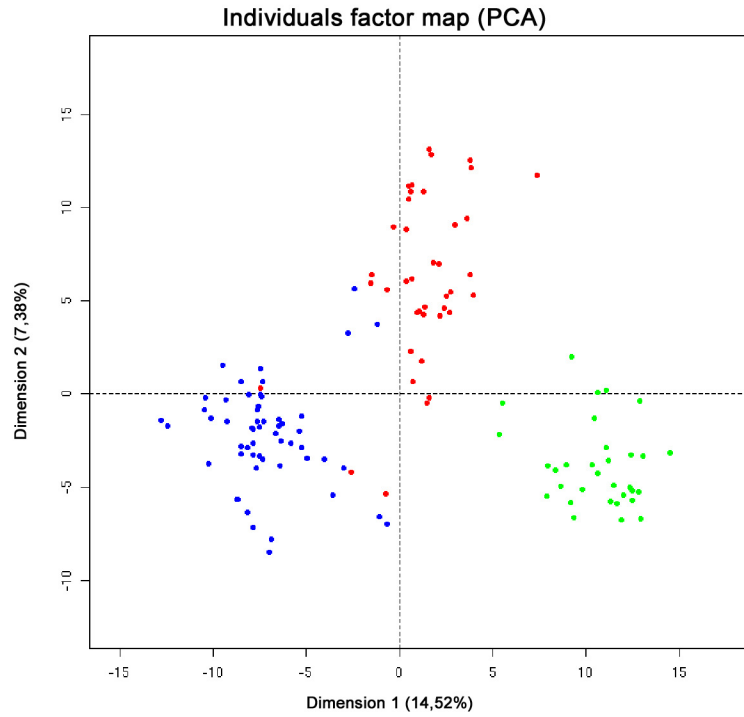

D

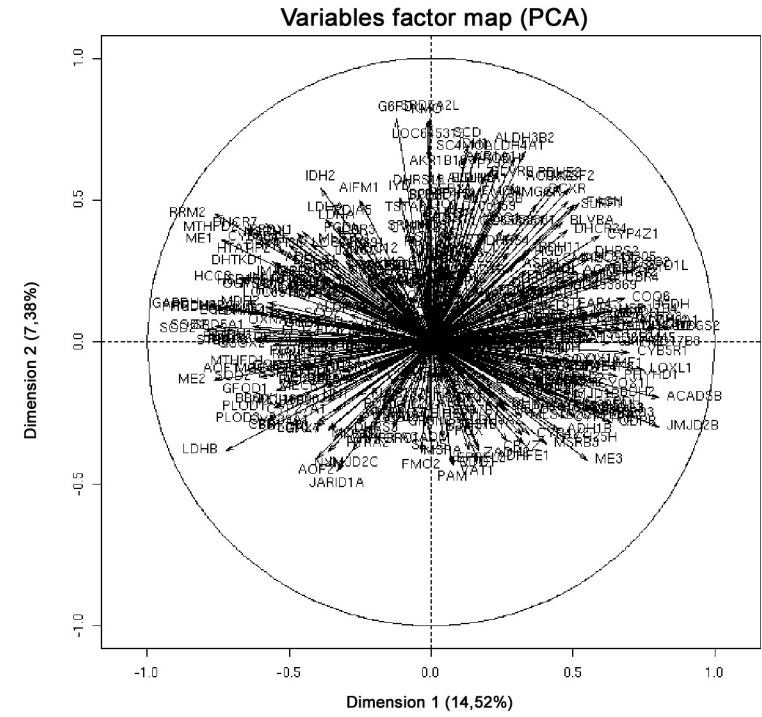

A

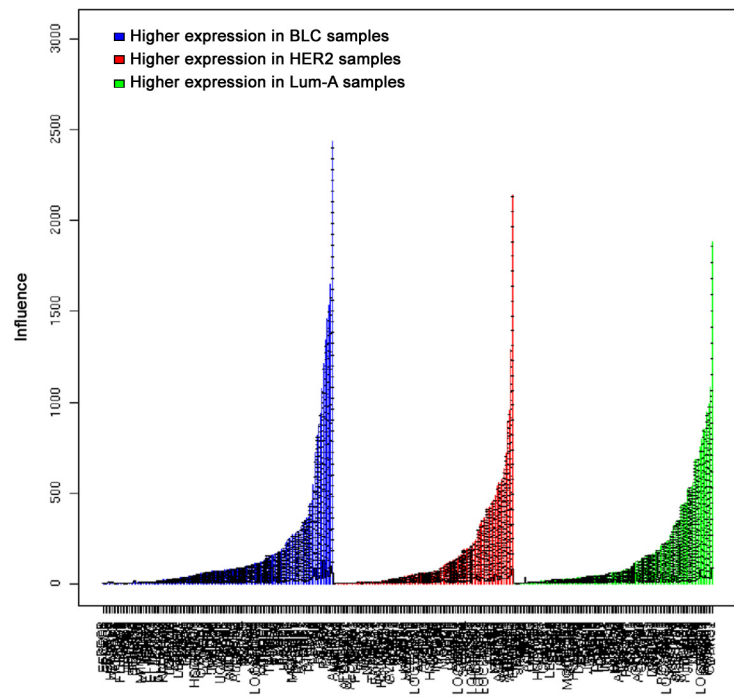

B

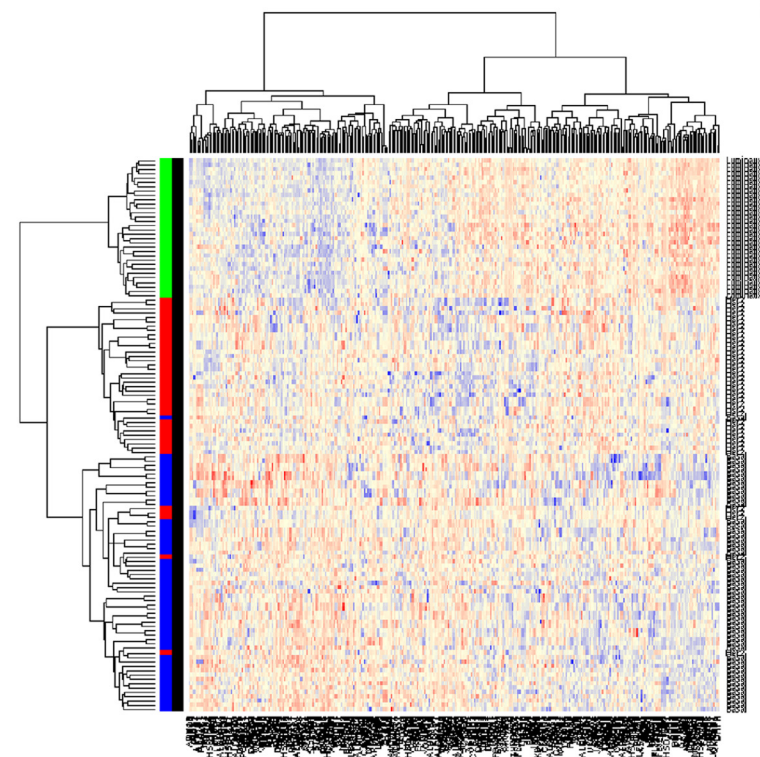

C

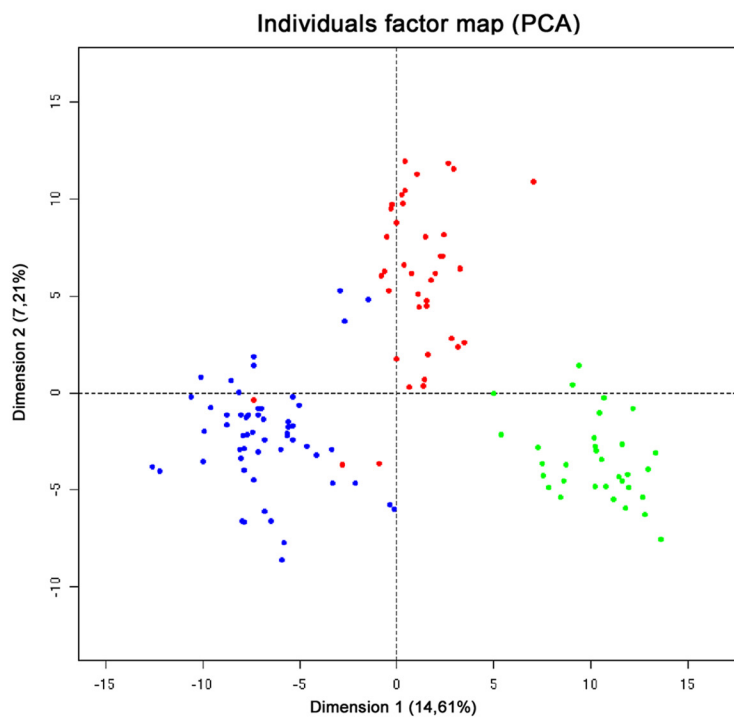

D

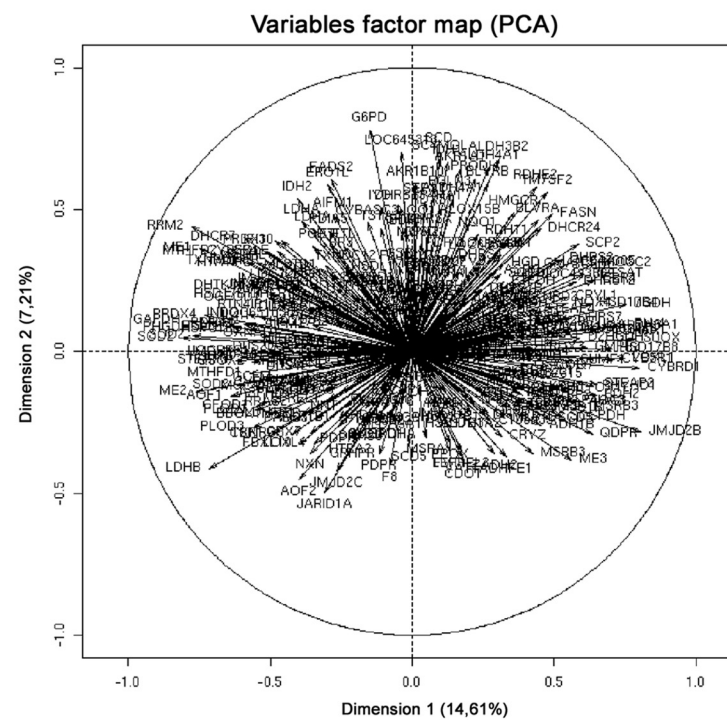

| Symbol         | Full Name                                                    | pValue          |
|----------------|--------------------------------------------------------------|-----------------|
| TM7SF2         | Transmembrane 7 superfamily, member 2                        | 8,41E-17        |
| ALDH4A1        | Aldehyde dehydrogenase, Family 4, subfamily A, member 1      | 5,72E-16        |
| <b>KMO</b>     | <b>Kynurenine 3-monooxygenase</b>                            | <b>1,37E-15</b> |
| <b>ALOX15B</b> | <b>Arachidonate-15-Lipoxygenase, second type</b>             | <b>1,49E-15</b> |
| ALDH3B2        | Aldehyde dehydrogenase 3 Family, member B2                   | 1,68E-15        |
| ACOX2          | Acyl-Coenzyme A oxidase 2, branched chain                    | 4,16E-15        |
| GPD1L          | Glycerol-3-phosphate dehydrogenase                           | 8,22E-15        |
| <b>CYP4Z1</b>  | <b>Cytochrome P450, family 4, subfamily Z, polypeptide 1</b> | <b>1,36E-14</b> |
| RETSAT         | Retinol saturase (all-trans-retinol 13,14-reductase)         | 1,82E-14        |
| G6PD           | Glucose-6-phosphate dehydrogenase                            | 2,03E-14        |
| RDHE2          | Short chain dehydrogenase/reductase family 16C, member 5     | 1,69E-13        |
| UGDH           | UDP-Glucose dehydrogenase                                    | 3,08E-13        |
| <b>PRODH</b>   | <b>Proline dehydrogenase (oxidase) 1</b>                     | <b>8,51E-13</b> |
| SCD            | Stearoyl-CoA desaturase                                      | 1,16E-12        |
| FASN           | Fatty acid synthase                                          | 3,95E-12        |
| SURF1          | Surfeit 1                                                    | 6,65E-12        |
| <b>SC4MOL</b>  | <b>sterol-C4-methyl oxidase-like</b>                         | <b>8,52E-12</b> |
| IDH1           | Isocitrate dehydrogenase 1 (NADP+), soluble                  | 1,97E-11        |
| <b>SUOX</b>    | <b>Sulfite oxidase</b>                                       | <b>4,97E-11</b> |
| AKR1B10        | Aldose reductase Family 1, member 10                         | 1,36E-10        |
| SCP2           | Sterol carrier protein 2                                     | 1,39E-10        |
| LOC647305      | similar to all-trans-13,14-dihydroretinol saturase           | 1,58E-10        |
| DEGS2          | Sphingolipid delta-4-Desaturase / C4-hydroxylase             | 1,64E-10        |
| <b>CYP2J2</b>  | <b>Cytochrome P450, family 2, subfamily J, polypeptide 2</b> | <b>2,79E-10</b> |
| HMGCR          | 3-hydroxy-3-methylglutaryl-Coenzyme A reductase              | 4,51E-10        |
| CBR4           | Carbonyl reductase 4                                         | 4,59E-10        |
| BLVRA          | Biliverdin reductase A                                       | 5,23E-10        |
| SRD5A2L        | steroid 5 alpha-reductase 3                                  | 5,66E-10        |
| MOSC2          | MOCO sulphurase C-terminal domain containing 2               | 1,49E-09        |
| LOC645313      | similar to stearoyl-CoA desaturase                           | 2,10E-09        |
| <b>NOX4</b>    | <b>NADPH oxidase 4</b>                                       | <b>2,19E-09</b> |
| PH-4           | prolyl 4-hydroxylase, transmembrane (endoplasmic reticulum)  | 8,99E-09        |
| AKR1A1         | Aldo-keto reductase family 1, member A1                      | 1,35E-08        |
| ACAD8          | Acyl-CoA dehydrogenase family, member 8                      | 1,57E-08        |
| CYBRD1         | Cytochrome b reductase 1                                     | 1,72E-08        |
| DCXR           | Dicarbonyl/L- L-xylulose reductase                           | 3,64E-08        |
| RDH11          | Retinol dehydrogenase 11 (all-trans/9-cis/11-cis)            | 7,40E-08        |
| DHRS2          | Dehydrogenase/reductase (SDR family) 2                       | 8,78E-08        |
| <b>ALOX15B</b> | <b>Arachidonate-15-Lipoxygenase, type B</b>                  | <b>9,40E-08</b> |
| DIO2           | Deiodinase, iodothyronine, type II                           | 1,24E-07        |
| DHCR24         | 24-dehydrocholesterol reductase (seladin-1)                  | 1,31E-07        |
| CMAH           | cytidine monophosphate-N-acetylneuraminic acid hydroxylase   | 1,67E-07        |
| DHRS12         | Dehydrogenase/reductase (SDR family) member 12               | 2,72E-07        |
| COQ6           | Coenzyme Q6                                                  | 3,30E-07        |
| LOC652445      | similar to NADPH oxidase 4                                   | 3,71E-07        |
| BLVRB          | Biliverdin reductase B                                       | 4,70E-07        |
| PRDX5          | Peroxiredoxin 5                                              | 5,28E-07        |

| Symbol        | Full Name                                                    | pValue           |
|---------------|--------------------------------------------------------------|------------------|
| <b>LOX</b>    | <b>Lysyl oxidase</b>                                         | <b>5,763E-07</b> |
| ALDH6A1       | Aldehyde dehydrogenase 6 family, member A1                   | 6,26E-07         |
| SC5DL         | Sterol-C5-desaturase                                         | 1,06E-06         |
| EGLN3         | Egl9, C. elegans, Homolog of. PHD3                           | 1,16E-06         |
| ASPH          | Aspartate beta-hydroxylase                                   | 1,19E-06         |
| IYD           | Iodotyrosine deiodinase                                      | 1,22E-06         |
| <b>CYP4X1</b> | <b>Cytochrome P450, family 4, subfamily X, polypeptide 1</b> | <b>1,39E-06</b>  |
| <b>LOXL1</b>  | <b>Lysyl oxidase-like 1</b>                                  | <b>2,76E-06</b>  |
| DHRS13        | Dehydrogenase/reductase (SDR family) 13                      | 4,96E-06         |
| DHRS7         | Dehydrogenase/reductase (SDR family) member 7                | 5,28E-06         |
| STEAP4        | Six-transmembrane epithelial antigen of prostate 4           | 5,83E-06         |
| HSD17B8       | Hydroxysteroid (17-beta) dehydrogenase 8                     | 6,43E-06         |
| D2HGDH        | D-2-hydroxyglutarate dehydrogenase                           | 1,25E-05         |
| HSD17B4       | Hydroxysteroid (17-beta) dehydrogenase 4                     | 1,39E-05         |
| <b>FMO4</b>   | <b>Flavin containing monooxygenase 4</b>                     | <b>1,85E-05</b>  |
| <b>NQO1</b>   | <b>NADPH dehydrogenase, quinone 1</b>                        | <b>2,31E-05</b>  |
| ACOX1         | Acyl-Coenzyme A oxidase 1, palmitoyl                         | 2,73E-05         |
| GLUD1         | Glutamate dehydrogenase 1                                    | 2,85E-05         |
| FADS2         | Fatty acid desaturase 2                                      | 2,91E-05         |
| LOC653381     | similar to Sorbitol dehydrogenase                            | 3,86E-05         |
| AKR7A3        | Aldo-keto reductase Family 7, member A3                      | 4,43E-05         |
| CYB5R1        | Cytochrome b reductase 1                                     | 5,24E-05         |
| SQRDL         | Sulfide quinone reductase-like (yeast)                       | 5,83E-05         |
| <b>HGD</b>    | <b>Homogentisate 1,2 dioxygenase</b>                         | <b>6,49E-05</b>  |
| CRYL1         | Crystallin, lambda 1                                         | 7,23E-05         |
| JMJD3         | Lysine (K)-specific demethylase 6B                           | 7,27E-05         |
| HSD17B11      | Hydroxysteroid (17-beta) dehydrogenase 11                    | 7,58E-05         |
| AOC3          | Amine oxidase, copper containing 3                           | 0,0001           |
| JARID1B       | Lysine (K)-specific demethylase 5B                           | 0,0001           |
| <b>FMO1</b>   | <b>Flavin containing monooxygenase 1</b>                     | <b>0,0002</b>    |
| LOC493869     | Glutathione peroxidase 8 (putative)                          | 0,0002           |
| MSRB2         | Methionine sulfoxide reductase B2                            | 0,0002           |
| TXNRD2        | Thioredoxin reductase 2                                      | 0,0002           |
| P4HA1         | prolyl 4-hydroxylase, alpha polypeptide I                    | 0,0003           |
| RSAD1         | Radical S-adenosyl methionine domain containing 1            | 0,0003           |
| CYBASC3       | Cytochrome b, ascorbate dependent 3                          | 0,0003           |
| C10orf59/RNLS | Renalase                                                     | 0,0004           |
| SUMF1         | Sulfatase modifying factor 1                                 | 0,0005           |
| UEVLD         | Ubiquitin E2 lactamate/malate dehydrogenase                  | 0,0005           |
| P4HA3         | prolyl 4-hydroxylase, alpha polypeptide III                  | 0,0006           |
| ALDH2         | Aldehyde dehydrogenase 2 family (mitochondrial)              | 0,0009           |
| MOSC1         | MOCO sulphurase C-terminal domain containing 1               | 0,0010           |
| PXDN          | Peroxidasin homolog (Drosophila)                             | 0,0011           |
| ALDH8A1       | Aldehyde dehydrogenase 8 family, member A1                   | 0,0011           |
| PCYOX1        | Prenylcysteine oxidase 1                                     | 0,0012           |
| RDH13         | Retinol dehydrogenase 13 (all-trans/9-cis)                   | 0,0013           |
| GPX2          | Glutathione peroxidase 2                                     | 0,0015           |

| Symbol         | Full Name                                                         | pValue        |
|----------------|-------------------------------------------------------------------|---------------|
| MTRR           | 5-methyltetrahydrofolate-homocysteine methyltransferase reductase | 0,0016        |
| DHRSX          | Dehydrogenase/reductase (SDR family) X-linked                     | 0,0029        |
| HSD17B6        | Hydroxysteroid (17-beta) dehydrogenase 6                          | 0,0032        |
| FMO5           | Flavin-containing monooxygenase 5                                 | 0,0033        |
| BDH1           | 3-hydroxybutyrate dehydrogenase, type 1                           | 0,0040        |
| STEAP2         | Six transmembrane epithelial antigen of the prostate 2            | 0,0043        |
| TSTA3          | Tissue specific transplantation antigen P35B                      | 0,0057        |
| SRXN1          | Sulfiredoxin 1 homolog (S. cerevisiae)                            | 0,0065        |
| SEPX1          | Selenoprotein X, 1                                                | 0,0066        |
| STEAP1         | Six transmembrane epithelial antigen of the prostate 1            | 0,0072        |
| P4HA2          | prolyl 4-hydroxylase, alpha polypeptide II                        | 0,0072        |
| MSRB3          | Methionine sulfoxide reductase B3                                 | 0,0081        |
| BDH2           | 3-hydroxybutyrate dehydrogenase, type 2                           | 0,0083        |
| APBA2BP        | N-terminal EF-hand calcium binding protein 3                      | 0,0088        |
| PDIA5          | Protein disulfide isomerase family A, member 5                    | 0,0102        |
| NDUFV2         | NADH dehydrogenase (ubiquinone) flavoprotein 2                    | 0,0125        |
| ETFDH          | Electron-transferring-flavoprotein dehydrogenase                  | 0,0130        |
| <b>CYP51A1</b> | <b>Cytochrome P450, family 51, subfamily A, polypeptide 1</b>     | <b>0,0131</b> |
| GPD2           | Glycerol-3-phosphate dehydrogenase 2 (mitochondrial)              | 0,0142        |
| <b>COX15</b>   | <b>Cytochrome c oxidase assembly protein</b>                      | <b>0,0155</b> |
| FTL            | Ferritin, light polypeptide                                       | 0,0169        |
| ERO1L          | Thioredoxin domain containing protein 4                           | 0,0171        |
| NMRAL1         | NmrA-like family domain containing 1                              | 0,0180        |
| BEST1          | Bestrophin 1                                                      | 0,0181        |
| GPX4           | Glutathione peroxidase 4 (phospholipid hydroperoxidase)           | 0,0199        |
| CTBP2          | C-terminal binding protein 2                                      | 0,0205        |
| PDHB           | Pyruvate dehydrogenase (lipoamide) beta                           | 0,0206        |
| GSR            | Glutathione reductase                                             | 0,0212        |
| OGDH           | Oxoglutarate (alpha-ketoglutarate) dehydrogenase (lipoamide)      | 0,0224        |
| TP53I3         | Tumor protein p53 inducible protein 3                             | 0,0225        |
| DHRS7B         | Dehydrogenase/reductase (SDR family) member 7B                    | 0,0232        |
| <b>CYP4F8</b>  | <b>Cytochrome P450, family 4, subfamily F, polypeptide 8</b>      | <b>0,0236</b> |
| GMPR2          | Guanosine monophosphate reductase 2                               | 0,0246        |
| DECR2          | 2,4-dienoyl CoA reductase 2, peroxisomal                          | 0,0249        |
| JMJD2B         | Jumonji domain-containing protein 2A                              | 0,0252        |
| FDFT1          | Farnesyl-diphosphate farnesyltransferase 1                        | 0,0255        |
| FBXL11         | F-box and leucine-rich repeat protein 11                          | 0,0299        |
| ADH1C          | ADH1C alcohol dehydrogenase 1C (class I), gamma polypeptide       | 0,0311        |
| ACADVL         | Acyl-Coenzyme A dehydrogenase, very long chain                    | 0,0316        |
| ACADSB         | Acyl-Coenzyme A dehydrogenase, short/branched chain               | 0,0356        |
| QSOX1          | Quiescin Q6 sulfhydryl oxidase 1                                  | 0,0364        |
| PRDX3          | Peroxiredoxin 3                                                   | 0,0366        |
| IDH2           | Isocitrate dehydrogenase 1 (NAD+)-oxidoreductase                  | 0,0375        |
| <b>CYP27B1</b> | <b>Cytochrome P450, family 27, subfamily B, polypeptide 1</b>     | <b>0,0396</b> |
| PNPO           | Pyridoxamine 5'-phosphate oxidase                                 | 0,0430        |
| DPYD           | Dihydropyrimidine dehydrogenase                                   | 0,0514        |



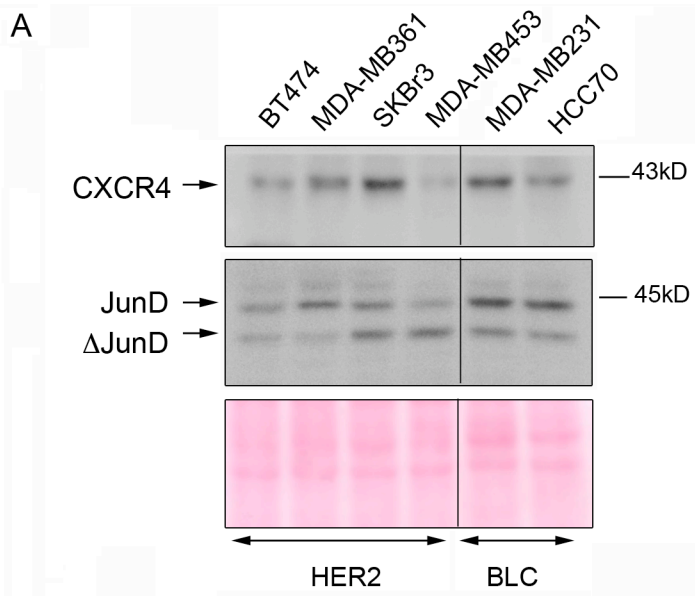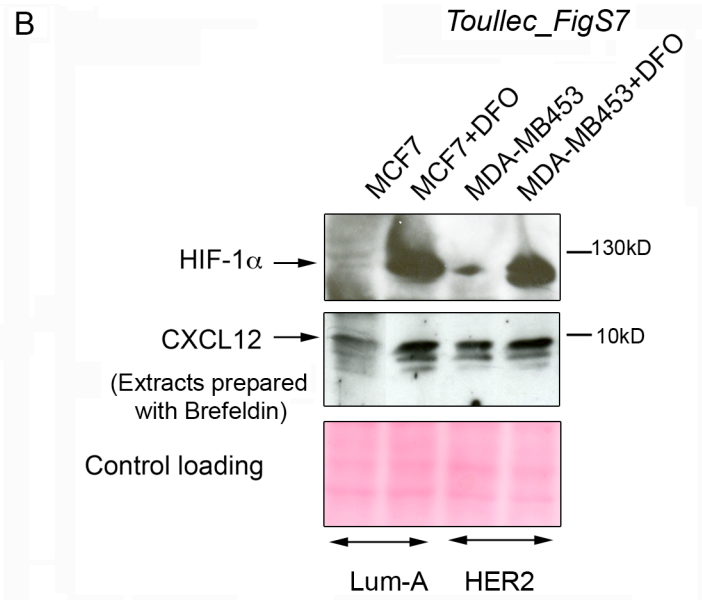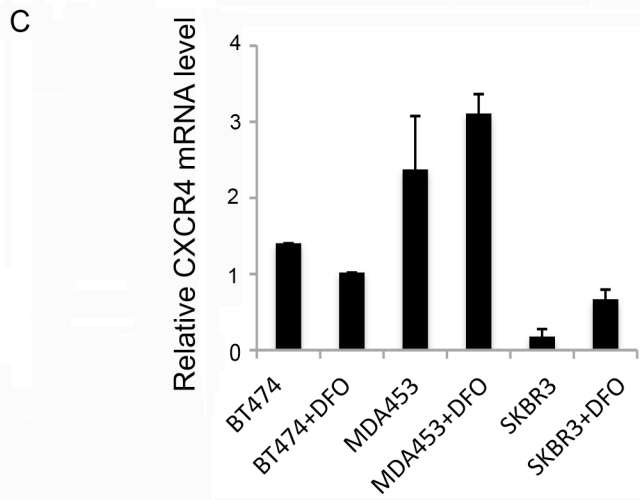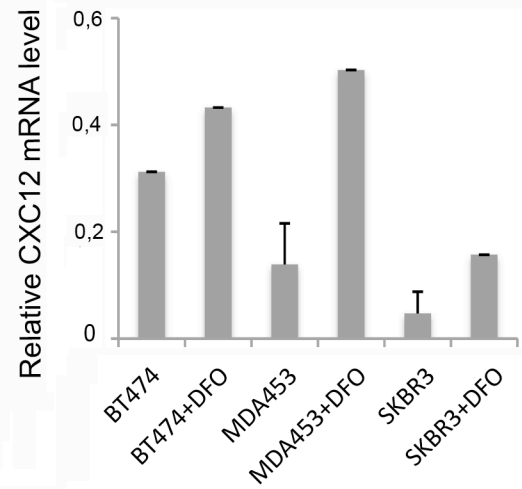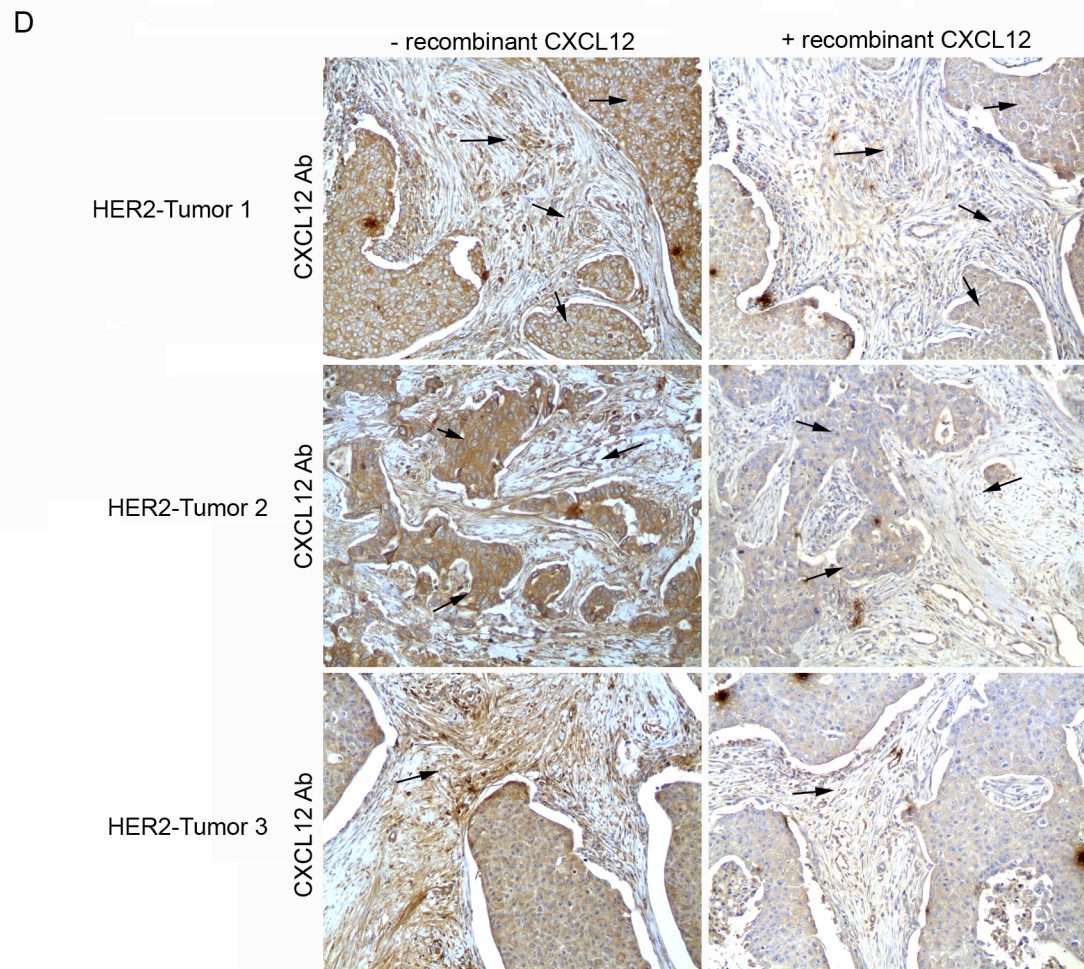

Supplement: emmm0002-0211-SD1.pdf [file emmm0002-0211-SD1.pdf]
